# Supplementary material for: Contrasting the Chromosomal Organization of Repetitive DNAs in Two Gryllidae Crickets with Highly Divergent Karyotypes
Source: PubMed Central journal article supplement (PMC4667936; doi:10.1371/journal.pone.0143540), 2015-12-02
Supplement: pone.0143540.s001.pdf [file pone.0143540.s001.pdf]

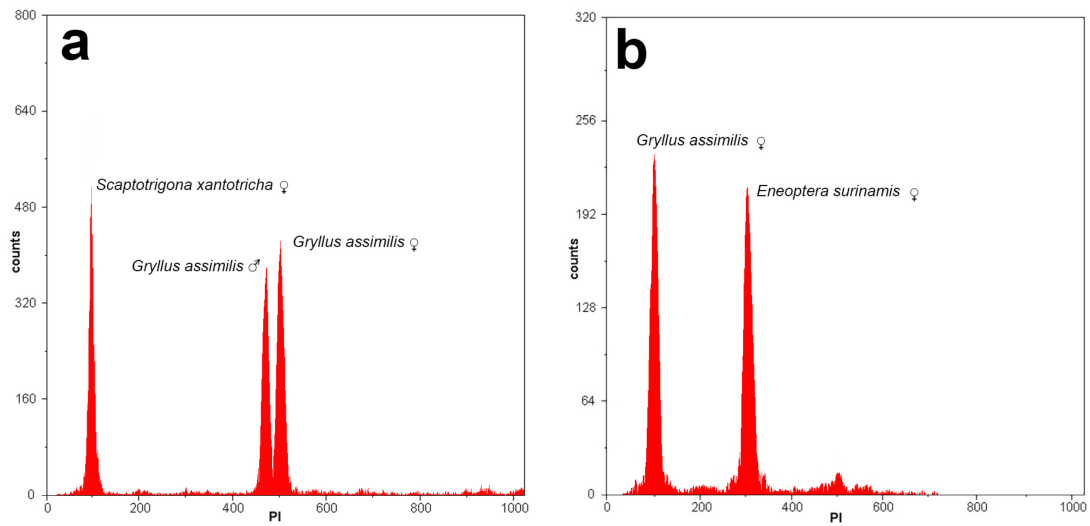

### C

| Sample                                    | Replicate 1 | Replicate 2 | Replicate 3 | Mean of DNA content (1C) |
|-------------------------------------------|-------------|-------------|-------------|--------------------------|
| <i>Scaptotrigona xantotricha</i> (female) | 0.44        | 0.44        | 0.44        | 0.44 pg                  |
| <i>Gryllus assimilis</i> (male)           | 2.07        | 2.075       | 2.05        | 2.06 pg                  |
| <i>G. assimilis</i> (female)              | 2.20        | 2.22        | 2.21        | 2.21 pg                  |
| <i>Eneoptera surinamensis</i> (male)      | 5.47        | 5.45        | 5.41        | 5.44 pg                  |
| <i>E. surinamensis</i> (female)           | 5.6         | 5.7         | 5.65        | 5.65 pg                  |
